# Supplementary material
Source: PubMed Central journal article supplement (PMC4862468)

**Supplemental Material:**

**Figure S1: Pairwise alignment of the region carrying Tn125 (*bla<sub>NDM-1</sub>*) between the *A. baumannii* strain R2090 (reverse complement) and R2091 applying Mauve.**

Chromosome coordinates are plotted on the x-axis and the y-axis denotes the percentage of sequence identity with 100% representing completely identical sequences. A: Chromosomal regions of strains R2090 and R2091 featuring high sequence similarity. Rectangles below the similarity plot represent coding sequences (CDSs). Colored rectangles denote the IS elements IS*Aba125* (red), a transposase gene (blue) and the gene *bla<sub>NDM-1</sub>* (green). B, C: Enlarged regions comprising the first SNPs adjacent to the left (B) and right hand side (C) of the almost identical region are shown.

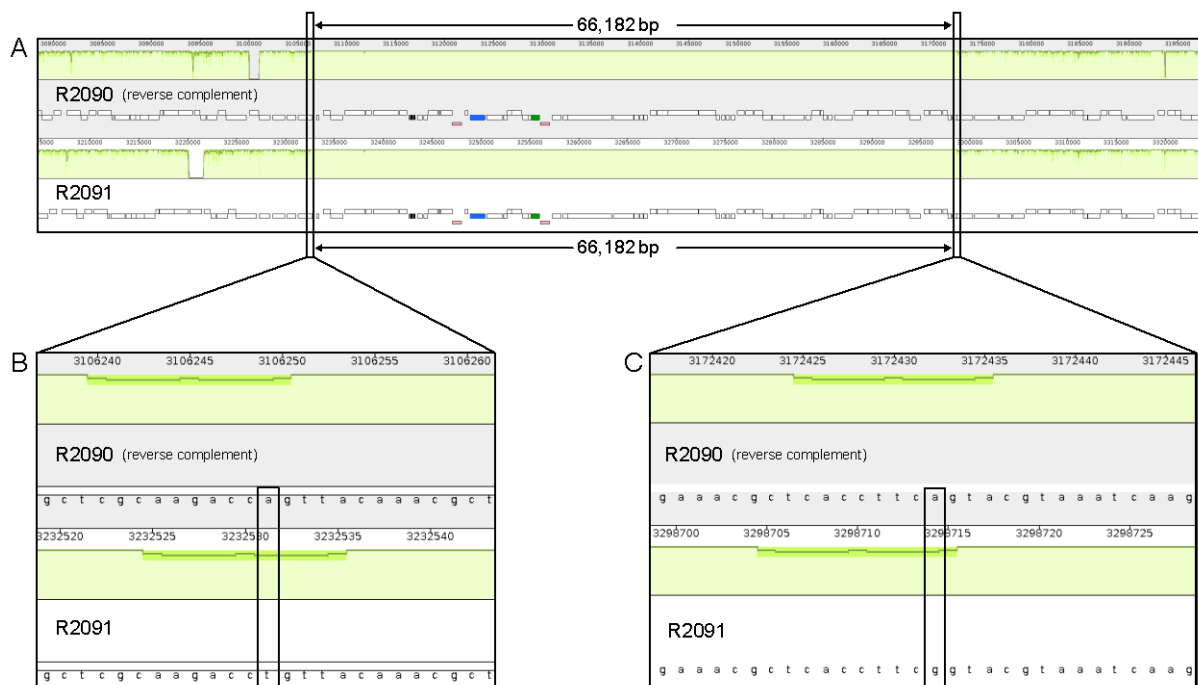

Supplement: AAC.00124-16_zac005165164so1.pdf [file AAC.00124-16_zac005165164so1.pdf]
